# Supplementary material
Source: Springer Nature journal article supplement (https://hal.science/hal-01290561v1/file/13567_2013_368_MOESM6_ESM.pdf)

**A**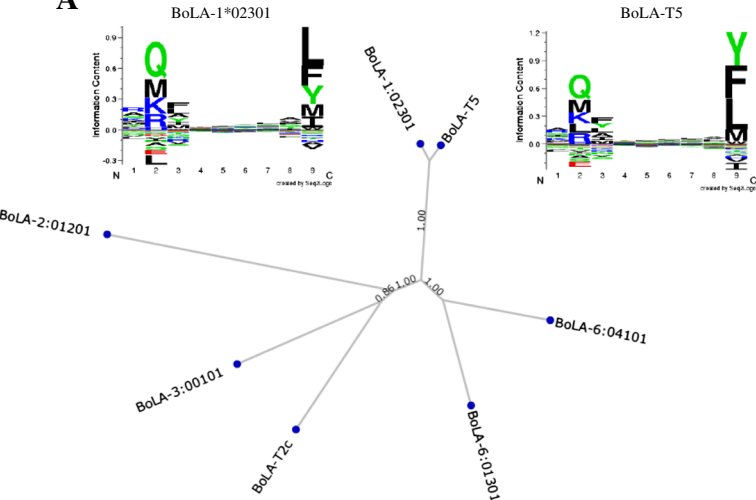**B**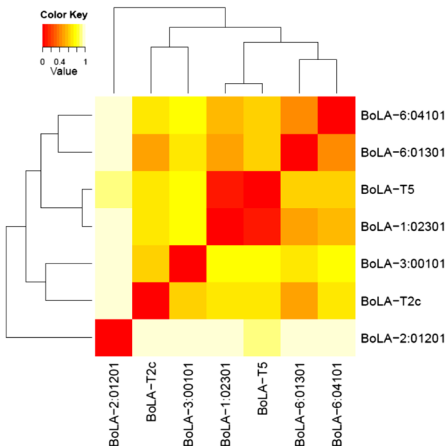

Supplement: MOESM6 [file 13567_2013_368_MOESM6_ESM.pdf]
